# Supplementary material for: Synchronously enhanced flame retardancy and mechanical properties of epoxy/carbon fiber composites achieved via an interfacial structure design
Source: Royal Society of Chemistry journal article supplement (doi:10.1039/d5ta02637g), 2025-01-01
Supplement: d5ta02637g1.pdf [file d5ta02637g1.pdf]

## Supporting Information

### **Synchronously Enhanced Flame Retardance and Mechanical Properties Epoxy/Carbon Fiber Composites Achieved by Interfacial Structure Design†**

Dou Hu, An-yan Wang, Xiao-dong Qi, Jing-hui Yang, De-xiang Sun\*, Yong Wang\*

*School of Chemistry, Key Laboratory of Advanced Technologies of Materials (Ministry of  
Education), Southwest Jiaotong University, Chengdu, 610031, China.*

#### **1. Experimental section**

##### ● **Note S1**

**Preparation method of C@H:** 0.8 g of OCF and 0.88 g of HCCP were added to a pressure resistant reactor containing 80 mL of anhydrous acetonitrile. After magnetic stirring at 25 °C for 10 min, the mixture was ultrasonicated for 5 min to enhance HCCP dispersion. Then, 5.2 mL of TEA was injected, and the reaction continued under nitrogen at 40 °C with stirring for 3 h. Finally, the fibers were filtered, washed, and dried to obtain the modified fibers named C@H.

**Preparation method of C@HB:** For the preparation of C@HB fibers, the initial steps were the same as those for C@H fibers. After the reaction with TEA, 3.12 g of BPS was added to the system, and the reaction continued for an additional 3 h. The fibers were then filtered, washed, and dried to obtain the modified fibers named C@HB.

**Preparation method of PZS particles:** 1.44 g of HCCP and 3.12 g of BPS were dissolved in 40 mL of anhydrous acetonitrile respectively. The solutions were magnetically stirred at room temperature for 10 min and then underwent ultrasonic treatment for 5 min to promote the dispersion of HCCP and BPS. Subsequently, the two solutions were mixed and stirred at 40 °C for 5 h. After the reaction was completed, the mixture was vacuum-filtered, and the reaction products were repeatedly washed with anhydrous ethanol and deionized water in an ultrasonic cleaner with an ultrasonic power of 60 watts to remove unreacted monomers and by-products. The modified carbon fibers were dried with a freeze dryer.

\*Corresponding author:

E-mail: [yongwang1976@swjtu.edu.cn](mailto:yongwang1976@swjtu.edu.cn) (Y. Wang), [sundexiang@swjtu.edu.cn](mailto:sundexiang@swjtu.edu.cn) (D.-x. Sun)

**Preparation method of E/C/P/6D composite:** 1.25 g of PZS (The approximate amount of PZS on the CF surface was calculated from the thermogravimetric analysis (TGA) test results of the C@P-18 sample.) and 3.75 g of CF were added to a certain volume of anhydrous ethanol. The subsequent work for preparing the composite was completed based on the exactly same operation procedures for E/C@P-18/D samples.

## ● Supplementary tables

**Table S1.** The composition of relevant composites.

| Samples       | CF (g) | C@P-x-y (g) | Epoxy (g) | DDM (g) | DOPO (g) | PZS (g) |
|---------------|--------|-------------|-----------|---------|----------|---------|
| E/C           | 5      | /           | 35.2      | 9.8     | /        | /       |
| E/C/3D        | 5      | /           | 34        | 9.5     | 1.5      | /       |
| E/C/6D        | 5      | /           | 32.8      | 9.2     | 3        | /       |
| E/C/P/6D      | 3.75   | /           | 32.8      | 9.2     | 3        | 1.25    |
| E/C@P-7-5     | /      | 5           | 35.2      | 9.8     | /        | /       |
| E/C@P-11-5    | /      | 5           | 35.2      | 9.8     | /        | /       |
| E/C@P-18-5    | /      | 5           | 35.2      | 9.8     | /        | /       |
| E/C@P-23-5    | /      | 5           | 35.2      | 9.8     | /        | /       |
| E/C@P-18-5/3D | /      | 5           | 34        | 9.5     | 1.5      | /       |
| E/C@P-18-5/6D | /      | 5           | 32.8      | 9.2     | 3        | /       |

**Table S2.** The surface elemental contents of CF, C@P-7 and C@P-18 obtained through XPS tests.

| Samples  | Elements content (%) |       |      |      |      |      |      |      |
|----------|----------------------|-------|------|------|------|------|------|------|
|          | C                    | O     | N    | P    | S    | O/C  | P/S  | P/N  |
| CF       | 86.99                | 12.33 | 0.68 | /    | /    | 0.14 | /    |      |
| C@P-7-5  | 78.13                | 17.23 | 1.80 | 1.57 | 1.28 | 0.22 | 1.23 | 0.87 |
| C@P-18-5 | 74.64                | 18.42 | 2.63 | 2.29 | 2.02 | 0.25 | 1.13 | 0.87 |

**Table S3.** TGA results of EP and its composites measured under nitrogen atmosphere.

|                     | CF   | OCF  | PZS  | C@P-7-5 | C@P-11-5 | C@P-18-5 | C@P-23-5 |
|---------------------|------|------|------|---------|----------|----------|----------|
| Residual mass (wt%) | 98.8 | 92.3 | 54.6 | 77.8    | 75.6     | 74.1     | 65.5     |

**Table S4.** Dynamic contact angles and surface energies of fibers.

| Samples  | Contact angle (°) |                                | Surface energy (mN/m) |              |            |
|----------|-------------------|--------------------------------|-----------------------|--------------|------------|
|          | H <sub>2</sub> O  | CH <sub>2</sub> I <sub>2</sub> | $\gamma_f^p$          | $\gamma_f^d$ | $\gamma_f$ |
| CF       | 71.6±1.1          | 68.0±2.1                       | 12.3±0.1              | 24.0±0.2     | 36.2       |
| C@P-7-5  | 66.3±0.6          | 63.0±1.0                       | 14.1±0.2              | 26.8±0.2     | 40.9       |
| C@P-11-5 | 64.0±1.1          | 62.6±1.5                       | 15.4±0.1              | 27.1±0.1     | 42.5       |
| C@P-18-5 | 62.2±0.6          | 60.6±0.6                       | 16.0±0.2              | 28.2±0.1     | 44.2       |
| C@P-23-5 | 60.6±2.0          | 60.2±2.3                       | 16.9±0.1              | 28.5±0.1     | 45.4       |

**Table S5.** TGA results of EP and its composites measured under nitrogen atmosphere. <sup>a</sup>

| Samples | $T_{5\%}$ (°C) | $T_{50\%}$ (°C) | $T_{max}$ (°C) | $\varphi_c$ (wt%) |
|---------|----------------|-----------------|----------------|-------------------|
|---------|----------------|-----------------|----------------|-------------------|

|                      |       |       |       |      |
|----------------------|-------|-------|-------|------|
| <b>EP</b>            | 357.0 | 381.1 | 370.1 | 13.0 |
| <b>E/C</b>           | 346.0 | 376.0 | 360.9 | 22.9 |
| <b>E/C/3D</b>        | 331.4 | 368.2 | 345.7 | 23.3 |
| <b>E/C/6D</b>        | 315.7 | 356.1 | 337.7 | 23.5 |
| <b>E/C/P/6D</b>      | 297.0 | 357.0 | 342.2 | 24.8 |
| <b>E/C@P-18-5</b>    | 297.7 | 344.9 | 328.8 | 24.6 |
| <b>E/C@P-18-5/3D</b> | 293.3 | 349.3 | 331.6 | 24.7 |
| <b>E/C@P-18-5/6D</b> | 288.3 | 356.0 | 338.4 | 25.1 |

a.  $T_{5\%}$  and  $T_{50\%}$ : Temperatures at weight loss of 5 and 50 wt%, respectively.

$T_{max}$ : Temperature at maximum degradation rate.

**Table S6.** The  $E'$  and  $T_g$  of epoxy and its composites.

|            | <b>EP</b> | <b>E/C</b> | <b>E/C/3D</b> | <b>E/C/6D</b> | <b>E/C/P/6D</b> | <b>E/C@P-18-5</b> | <b>E/C@P-18-5/3D</b> | <b>E/C@P-18-5/6D</b> |
|------------|-----------|------------|---------------|---------------|-----------------|-------------------|----------------------|----------------------|
| $T_g$ (°C) | 156.0     | 156.9      | 148.0         | 145.2         | 143.1           | 160.0             | 151.2                | 149.1                |
| $E'$ (MPa) | 1749.1    | 1614.4     | 1852.6        | 3755.9        | 3731.1          | 3455.2            | 3622.9               | 4083.9               |

**Table S7.** The CCT testing results of representative samples.

| <b>Samples</b>       | <b>TTI (s)</b> | <b>PHRR (kW/m<sup>2</sup>)</b> | <b>THR (MJ/m<sup>2</sup>)</b> | <b>CO<sub>2</sub>P (g/s)</b> | <b>COP (g/s)</b> | <b>EHC (MJ/kg)</b> | <b>TSP (m<sup>2</sup>)</b> | <b>CY (wt%)</b> |
|----------------------|----------------|--------------------------------|-------------------------------|------------------------------|------------------|--------------------|----------------------------|-----------------|
| <b>E/C</b>           | 88             | 740.4                          | 71.2                          | 0.42                         | 0.22             | 25.1               | 17.4                       | 20.7            |
| <b>E/C/6D</b>        | 72             | 462.1                          | 49.8                          | 0.26                         | 0.030            | 22.9               | 15.3                       | 23.8            |
| <b>E/C/P/6D</b>      | 69             | 523.1                          | 55.0                          | 0.28                         | 0.030            | 22.3               | 14.8                       | 23.6            |
| <b>E/C@P-18-5</b>    | 68             | 685.7                          | 59.8                          | 0.40                         | 0.028            | 24.6               | 13.4                       | 23.4            |
| <b>E/C@P-18-5/6D</b> | 62             | 362.0                          | 45.4                          | 0.22                         | 0.026            | 19.1               | 11.6                       | 27.6            |

**Table S8.** The tensile modulus, tensile strength, elongation at break, flexural strength and impact strength of epoxy and its composites.

| <b>Samples</b>       | <b>Tensile modulus (MPa)</b> | <b>Tensile strength (MPa)</b> | <b>Elongation at break (%)</b> | <b>Flexural strength (MPa)</b> | <b>Impact strength (kJ/m<sup>2</sup>)</b> |
|----------------------|------------------------------|-------------------------------|--------------------------------|--------------------------------|-------------------------------------------|
| <b>EP</b>            | 1151.9±28.5                  | 51.2±0.9                      | 7.7±0.4                        | 231.7±5.9                      | 20.4±0.4                                  |
| <b>E/C</b>           | 1086.1±16.2                  | 51.8±0.8                      | 4.7±0.2                        | 196.1±15.7                     | 19.6±0.5                                  |
| <b>E/C/3D</b>        | 2228.8±30.7                  | 54.4±1.8                      | 3.3±0.1                        | \                              | 17.7±2.5                                  |
| <b>E/C/6D</b>        | 2715.8±70.8                  | 63.1±1.1                      | 2.8±0.2                        | 216.3±6.1                      | 15.9±1.9                                  |
| <b>E/C/P/6D</b>      | 2683.3±40.4                  | 58.7±2.1                      | 2.7±0.1                        | \                              | 15.1±0.5                                  |
| <b>E/C@P-7-5</b>     | 1740.8±90.1                  | 60.3±2.5                      | 5.0±0.1                        | \                              | 21.8±0.8                                  |
| <b>E/C@P-11-5</b>    | 1837.6±48.1                  | 63.6±0.5                      | 5.2±0.1                        | \                              | 22.6±0.5                                  |
| <b>E/C@P-18-5</b>    | 1902.4±27.1                  | 68.6±2.4                      | 5.3±0.2                        | 255.6±3.8                      | 24.5±2.7                                  |
| <b>E/C@P-23-5</b>    | 1850.0±62.4                  | 64.3±2.0                      | 4.8±0.1                        | \                              | 23.5±0.5                                  |
| <b>E/C@P-18-5/3D</b> | 2350.1±52.1                  | 69.8±2                        | 4.5±0.1                        | \                              | 20.4±1.4                                  |
| <b>E/C@P-18-5/6D</b> | 2811.9±44.2                  | 72.9±3.4                      | 4.4±0.2                        | 294.0±7.1                      | 19.6±0.3                                  |

**Table S9.** Comparison of tensile strength between the first measurement and the 30<sup>th</sup> measurement of representative specimens. The residual strain was also provided.

| <b>EP</b> | <b>E/C</b> | <b>E/C/6D</b> | <b>E/C@P-18-5</b> | <b>E/C@P-18-</b> |
|-----------|------------|---------------|-------------------|------------------|
|-----------|------------|---------------|-------------------|------------------|

|                                                        | 5/6D      |           |           |           |          |
|--------------------------------------------------------|-----------|-----------|-----------|-----------|----------|
| <b>Tensile strength (MPa)</b>                          | 19.1±0.2  | 18.5±0.1  | 31.1±0.2  | 29.3±0.2  | 34.0±0.1 |
| <b>Tensile strength<sup>30</sup> (MPa)<sup>a</sup></b> | 18.9±0.1  | 17.6±0.1  | 29.3±0.1  | 28.2±0.1  | 32.5±0.3 |
| <b>Residual strain (%)<sup>b</sup></b>                 | 0.16±0.01 | 0.19±0.01 | 0.28±0.01 | 0.15±0.01 | 0.2±0.01 |

a Tensile strength<sup>30</sup> (MPa): Maximum stress of the composite specimen at the 30<sup>th</sup> cyclic tensile test.

b Residual strain (%): The strain of the composite specimen when the stress was zero after 30 cycles of tensile testing.

**Table S10.** Comparison of flame retardancy and mechanical properties of short carbon fiber-reinforced resin composites<sup>[49-53]</sup>.

| Mtrix                                            | Fiber content | Methods of fiber modification             | Flame retardant                                                     | Flame retardancy |       |                            | Mechanical properties |                     |
|--------------------------------------------------|---------------|-------------------------------------------|---------------------------------------------------------------------|------------------|-------|----------------------------|-----------------------|---------------------|
|                                                  |               |                                           |                                                                     | LOI              | UL-94 | CCT                        | Tensile strength      | Elongation at break |
| EP(This work)                                    | 10%           | In-situ grown PZS particles               | 6wt% of DOPO                                                        | 51.7             | V-0   | PHRR:-51.1%<br>THR: -36.3% | +40.7%                | -6.4%               |
| EP <sup>[49]</sup>                               | 1%            | Grafting silane coupling agents           | /                                                                   | /                | /     | PHRR:-13.5%<br>TSP:-26.4%  | +5.2%                 | /                   |
| EP <sup>[50]</sup>                               | 1%            | In-situ grown iron particles              | 4wt% of ammonium polyphosphate (APP)                                | 27.5%            | NR    | THR:-22.5%<br>TSP:-30.4%   | -6.1%                 | -21.4%              |
| EP <sup>[51]</sup>                               | 1%            | In-situ growth of metal-organic framework | 4wt% of APP                                                         | 28.9%            | V-0   | THR:-16.6%<br>TSP:-27.3%   | +8.1%                 | -14.3%              |
| Poly(lactic acid) (PLA) <sup>[52]</sup>          | 15%           | /                                         | 20wt% of aluminum hydroxide (ATH) and 5wt% aluminum hydroxide (MMT) | 32%              | V-0   | PHRR:-57.9%                | +16.8%                | -33.2%              |
| Thermoplastic polyurethane (TPU) <sup>[53]</sup> | 20%           | /                                         | 20wt% of silicon wrapped ammonium polyphosphate (SiAPP)             | /                | /     | PHRR:-72.5%<br>THR: -48.2% | /                     | /                   |

## ● Supplementary Figures

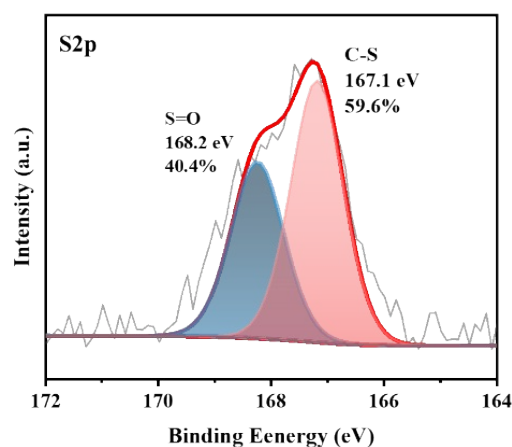

**Figure S1.** XPS S 2p spectrum of C@P-18-5 sample.

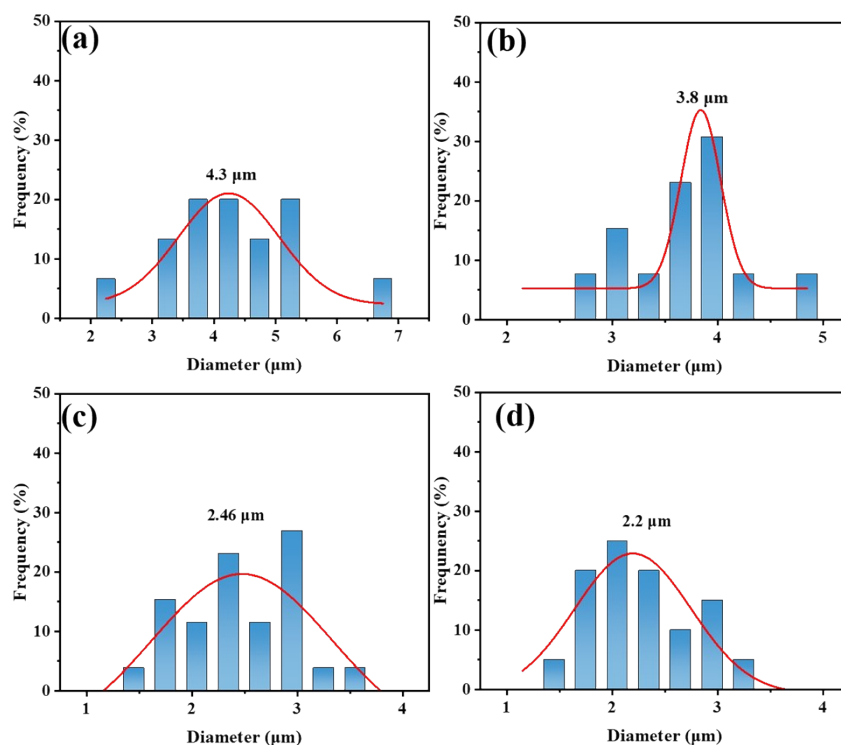

**Figure S3.** Diameter distribution of PZS particles on C@P fibers. The average diameters are also denoted. (a) C@P-7-5, (b) C@P-11-5, (c) C@P-18-5 and (d) C@P-23-5.

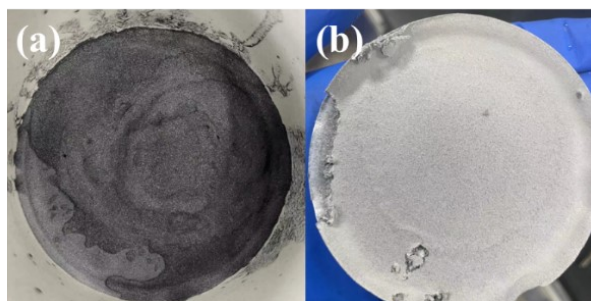

**Figure S3.** Digital photos showing the filter membrane appearance after vacuum-assisted filtrating (a) C@P-18 and (b) C@P-23. The sample was prepared at a reaction time of 5 h, and the ratio of two additions of HCCP was set at 1.5:1.

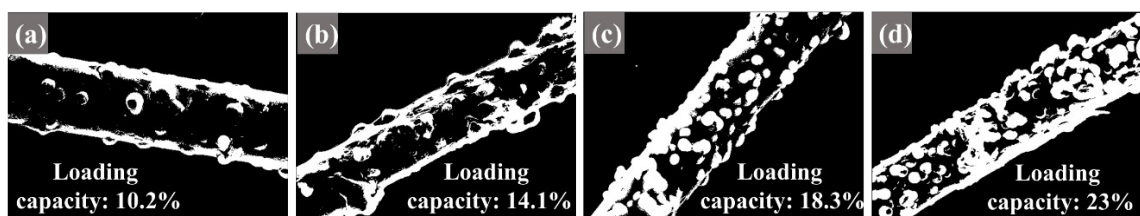

**Figure S4.** ImageJ-processed images display the surface particle loading of (a) C@P-7-5, (b) C@P-11-5, (c) C@P-18-5, and (d) C@P-23-5.

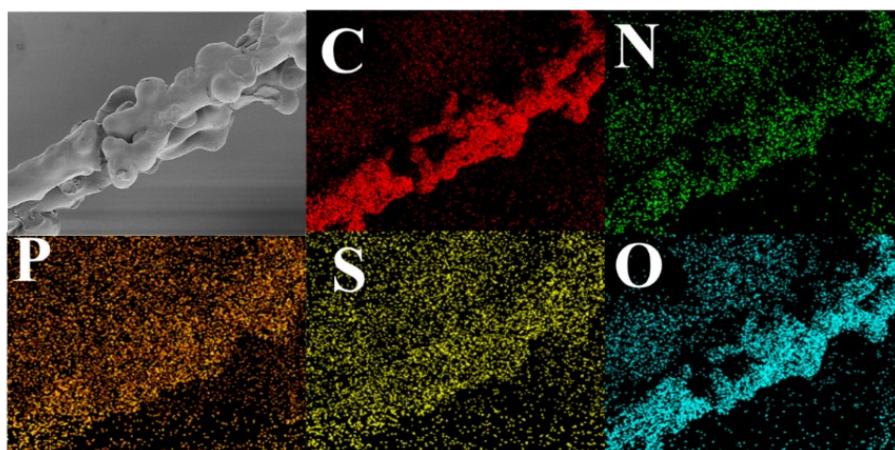

**Figure S5.** The EDS elemental mapping images of PZS nanoparticles on C@P-18-5 (where C represents carbon, N represents nitrogen, O represents oxygen, P represents phosphorus, and S represents sulfur). The sample was prepared at a reaction time of 5 h, and the ratio of two additions of HCCP was set at 1.5:1.

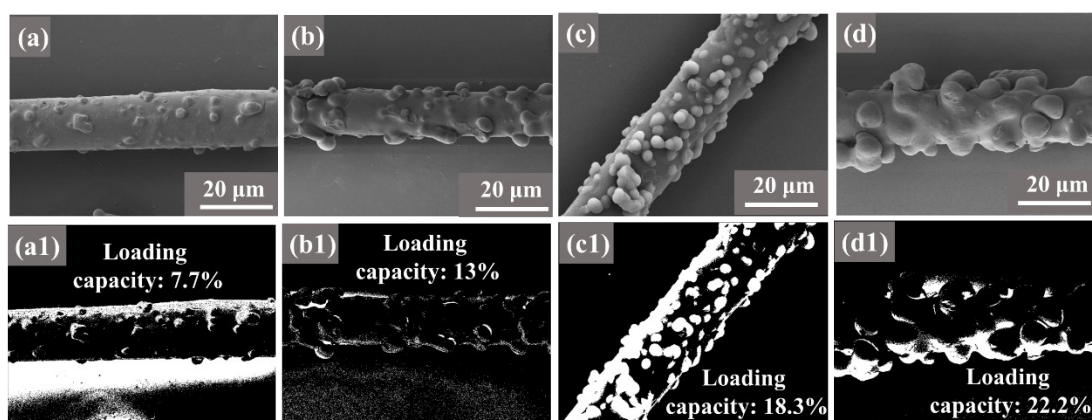

**Figure S6.** SEM images showing the morphologies of C@P-18 reacted for (a) 3 h, (b) 4 h, (c) 5 h, and (d) 6 h. ImageJ-processed images display the surface particle loading of C@P-18 for (a1) 3 h, (b1) 4 h, (c1) 5 h, and (d1) 6 h. The ratio of HCCP addition was 1.5:1.

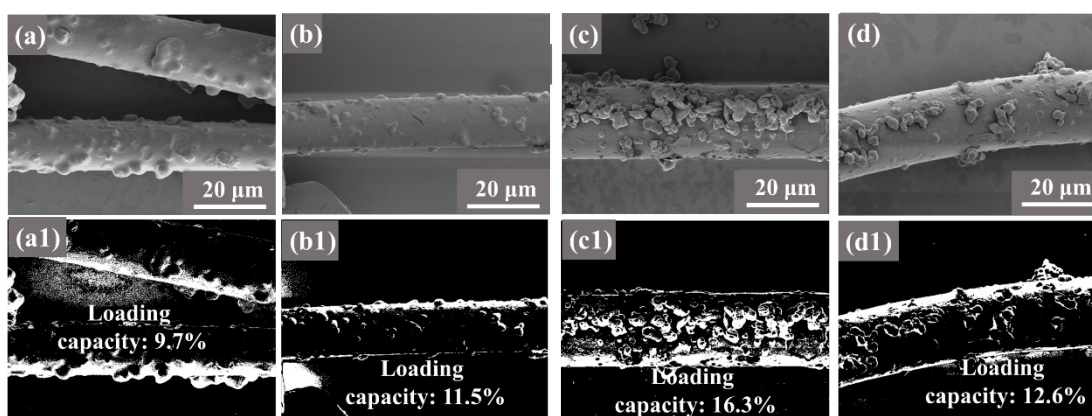

**Figure S7.** SEM images showing the morphologies of C@P-18-5 with the ratio of two additions of HCCP of (a) 2:1, (b) 1:1, (c) 1:1.5 and (d) 2:1. ImageJ-processed images display the surface particle loading of C@P-18-5 with the ratio of two additions of HCCP of (a1) 2:1, (b1) 1:1, (c1) 1:1.5 and (d1) 2:1. The reaction time was set at 5 h.

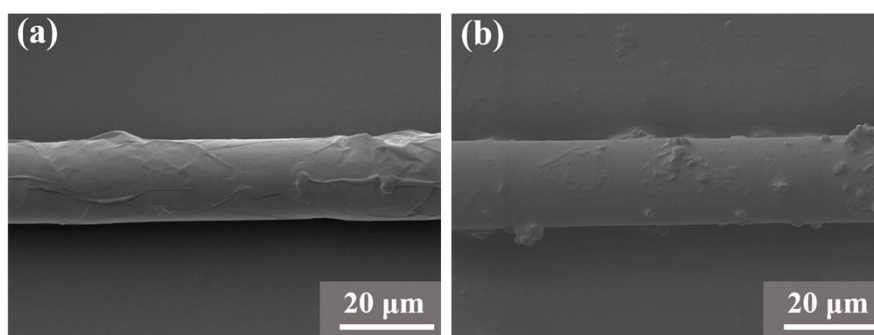

**Figure S8.** SEM images showing the morphologies of (a) C@H and (b) C@HB.

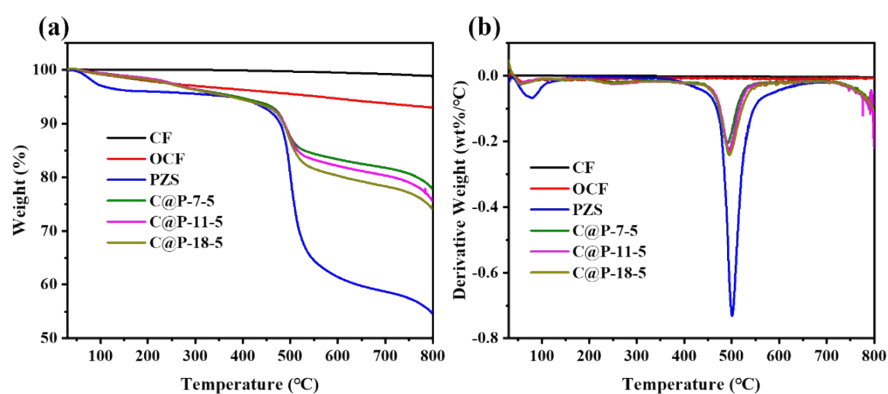

**Figure S9.** TGA (a) and DTG (b) curves of PZS, untreated CF, OCF and C@P samples.

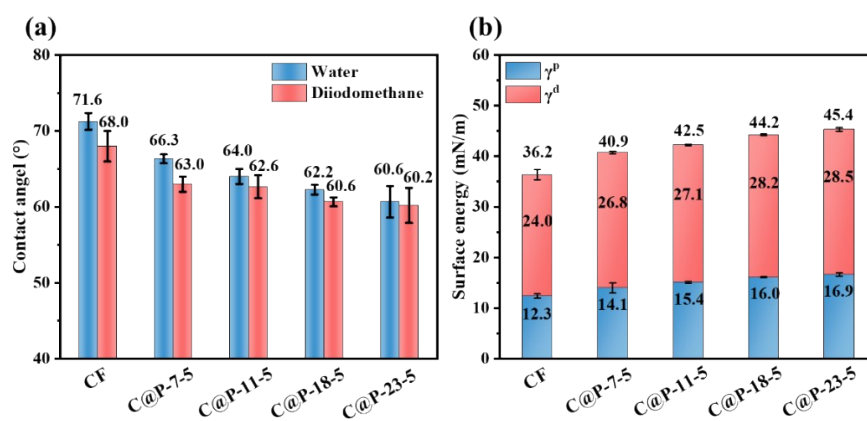

**Figure S10.** (a) Contact angles and (b) surface energies of untreated CF and the modified fibers as indicated.



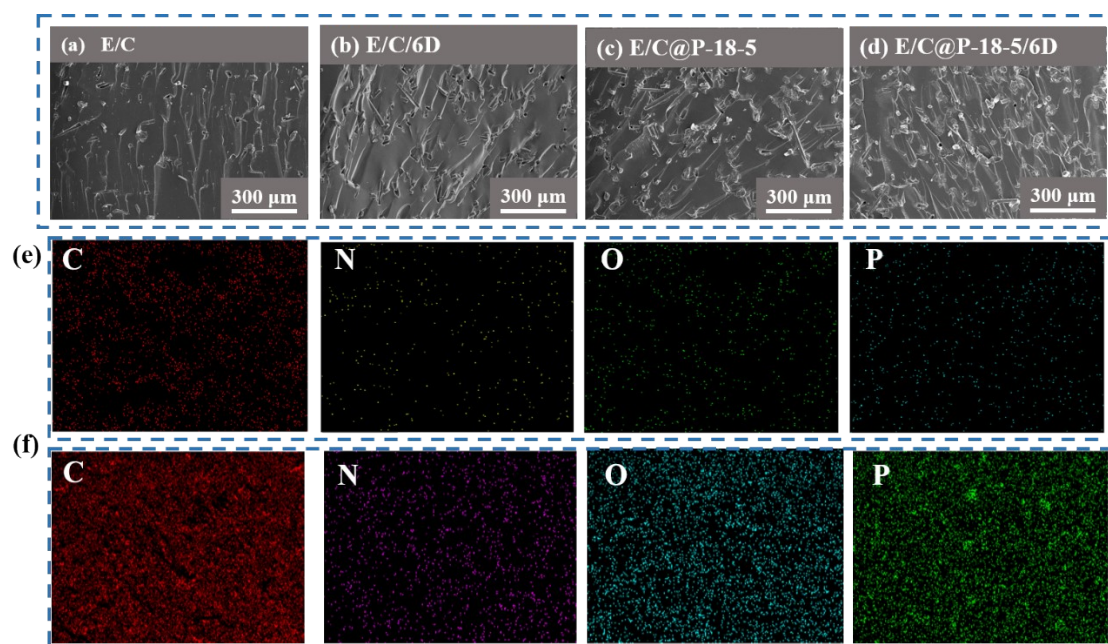

**Figure S11.** SEM images showing the fiber dispersion in the composites of (a) E/C, (b) E/C/6D, (c) E/C@P-18-5 and (d) E/C@P-18-5/6D. (e) and (f) showing the EDS elemental mapping images of DOPO in the (e) E/C/6D and (f) E/C@P-18-5/6D sample (where C represents carbon, N represents nitrogen, O represents oxygen and P represents phosphorus).

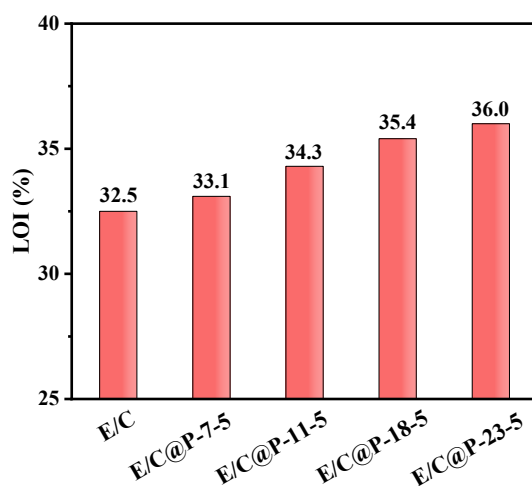

**Figure S12.** Comparison of LOI values among E/C@P-7-5, E/C@P-11-5 and E/C@P-23-5 samples.



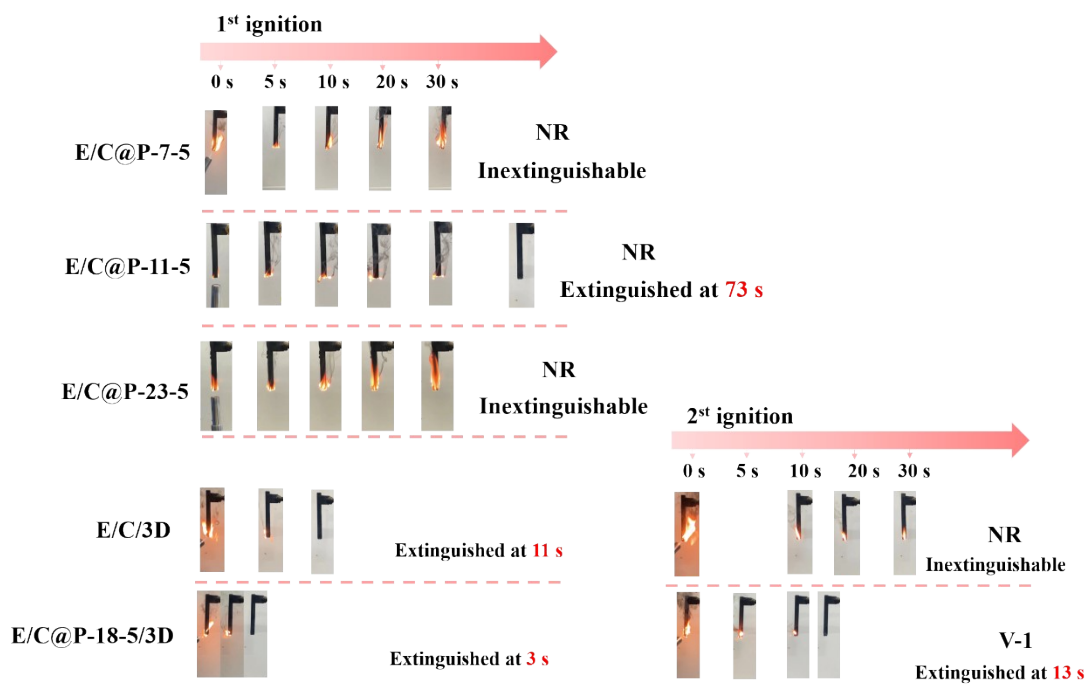

**Figure S13.** Digital photos showing the combustion behaviors of some samples as indicated in UL-94 testing.

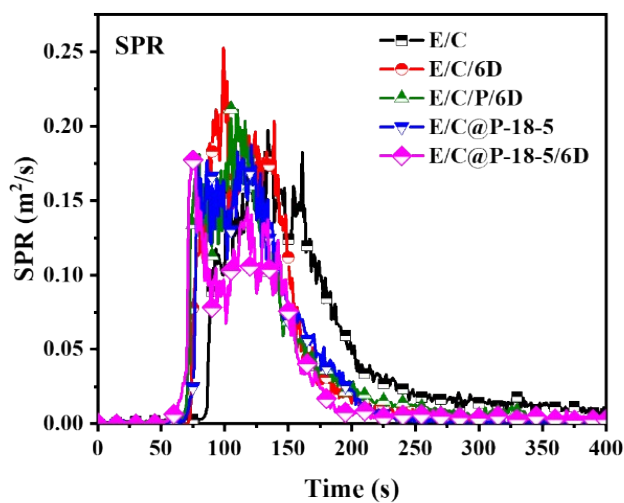

**Figure S14.** SPR curves of different samples obtained during cone calorimeter tests.

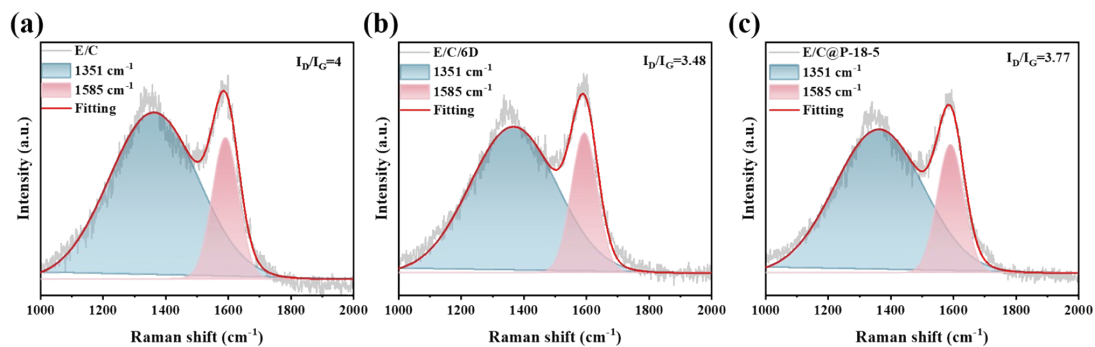

**Figure S15.** Raman spectra of the char residues of (a) E/C, (b) E/C/6D, and (c) E/C@P-18 samples after combustion.

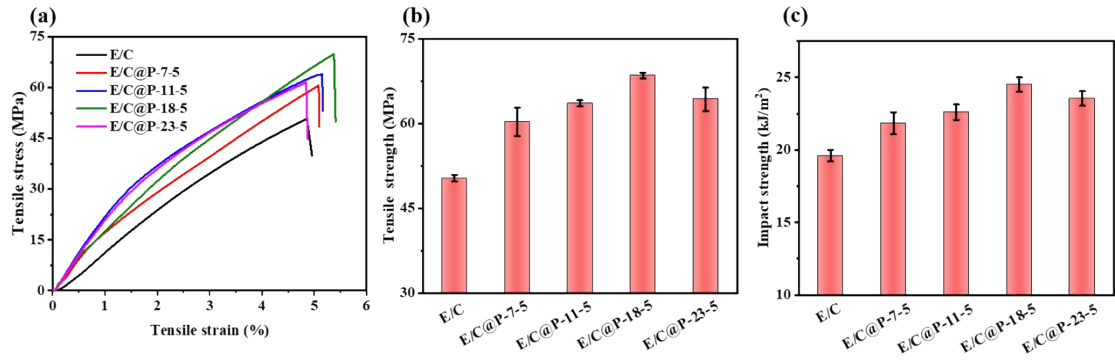

**Figure S16.** Mechanical properties of the representative composite samples as indicated in the graphs. (a) Stress-strain curves, (b) tensile strength, (c) unnotched Izod impact strength.

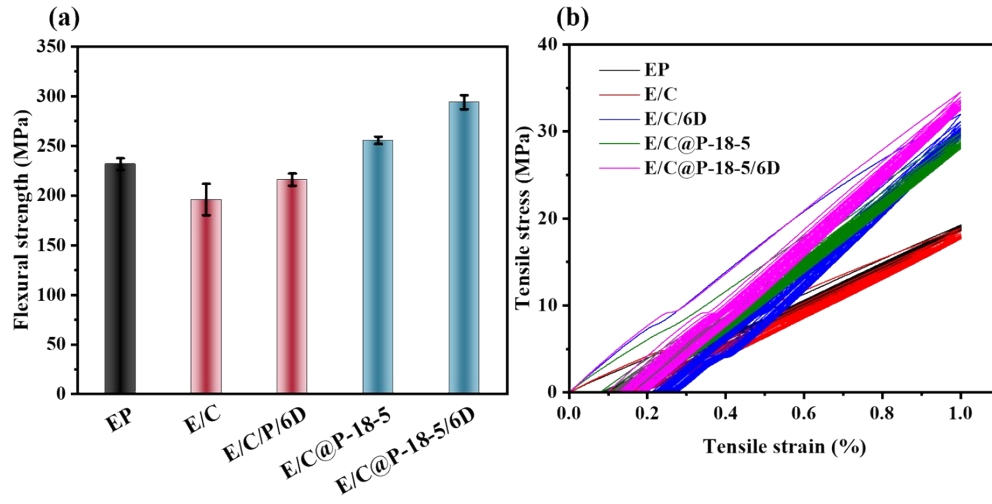

**Figure S17.** Mechanical properties of the representative composite samples as indicated in the graphs. (a) Flexural strength and (b) stress-strain curves of cyclic tensile testing.
